# Supplementary material for: SARS-CoV-2 vaccines elicit durable immune responses in infant rhesus macaques
Source: PubMed Central journal article supplement (PMC8774290; doi:10.1126/sciimmunol.abj3684), 2021-06-15
Supplement: NIHMS1770510-supplement-Suppl_Fig_S1-S17_and_Suppl_Table_S1-S2.pdf [file NIHMS1770510-supplement-Suppl_Fig_S1-S17_and_Suppl_Table_S1-S2.pdf]

## Supplementary Materials for

### **SARS-CoV-2 vaccines elicit durable immune responses in infant rhesus macaques**

Carolina Garrido *et al.*

Corresponding author: Kristina De Paris, [abelk@med.unc.edu](mailto:abelk@med.unc.edu)

Published 15 June 2021, *Sci. Immunol.* **6**, eabj3684 (2021)  
DOI: [10.1126/sciimmunol.abj3684](https://doi.org/10.1126/sciimmunol.abj3684)

#### **The PDF file includes:**

Figs. S1 to S17  
Tables S1 and S2

#### **Other Supplementary Material for this manuscript includes the following:**

Table S3

## Supplementary Figures

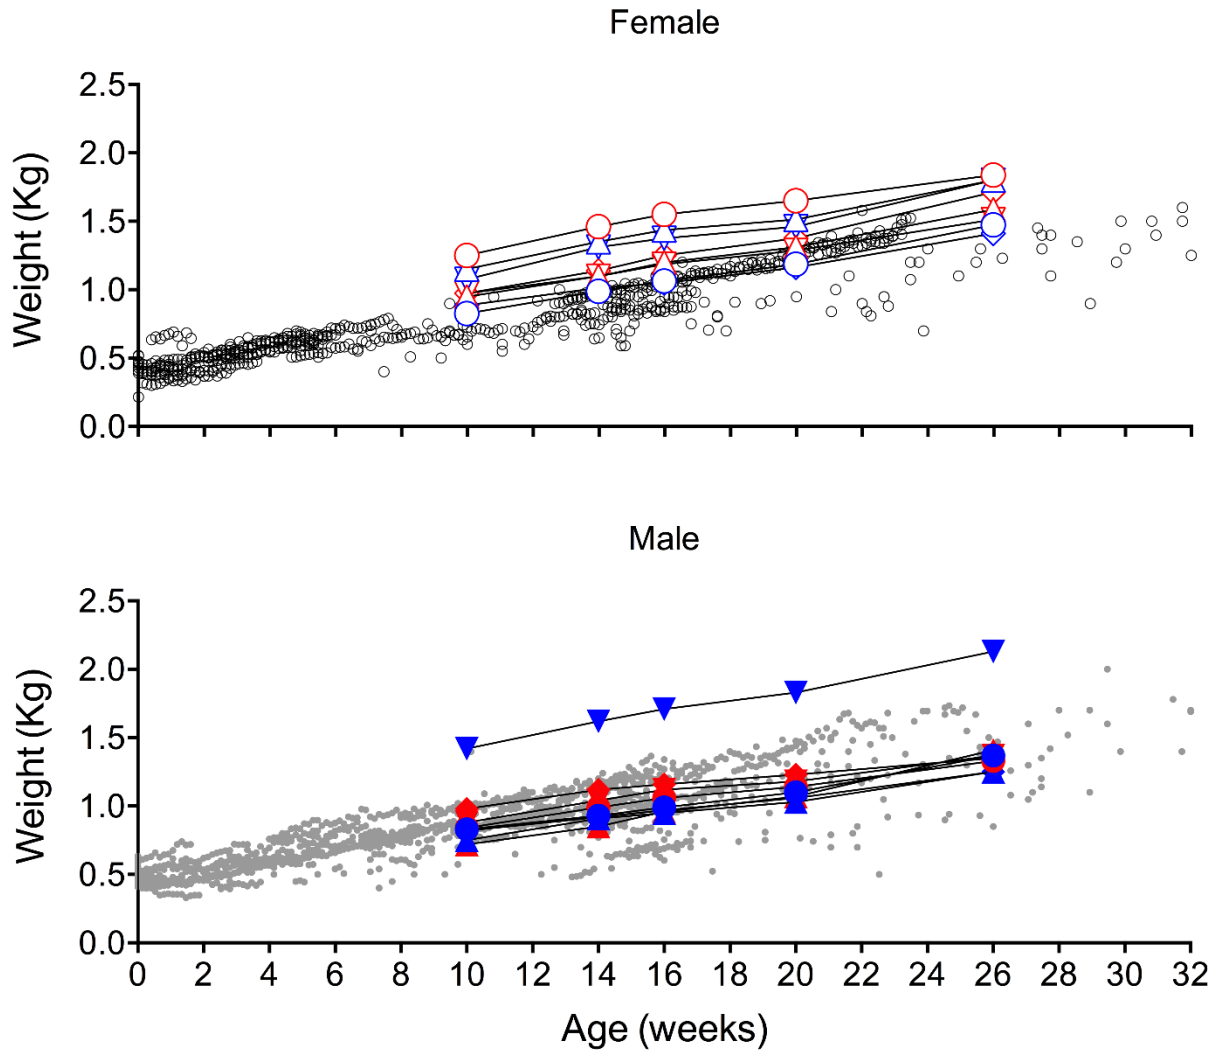

**Fig. S1. Weight gain of SARS-CoV-2 immunized infant rhesus macaques.**

Longitudinal weight data for all female (top) and male (bottom) animals from this study with their respective symbol shapes and colors (Table 1) overlaid with historical weight data from age and sex-matched infant rhesus monkeys housed outdoors at the CNPRC, Davis California (open black circles- female; filled gray circles- male).

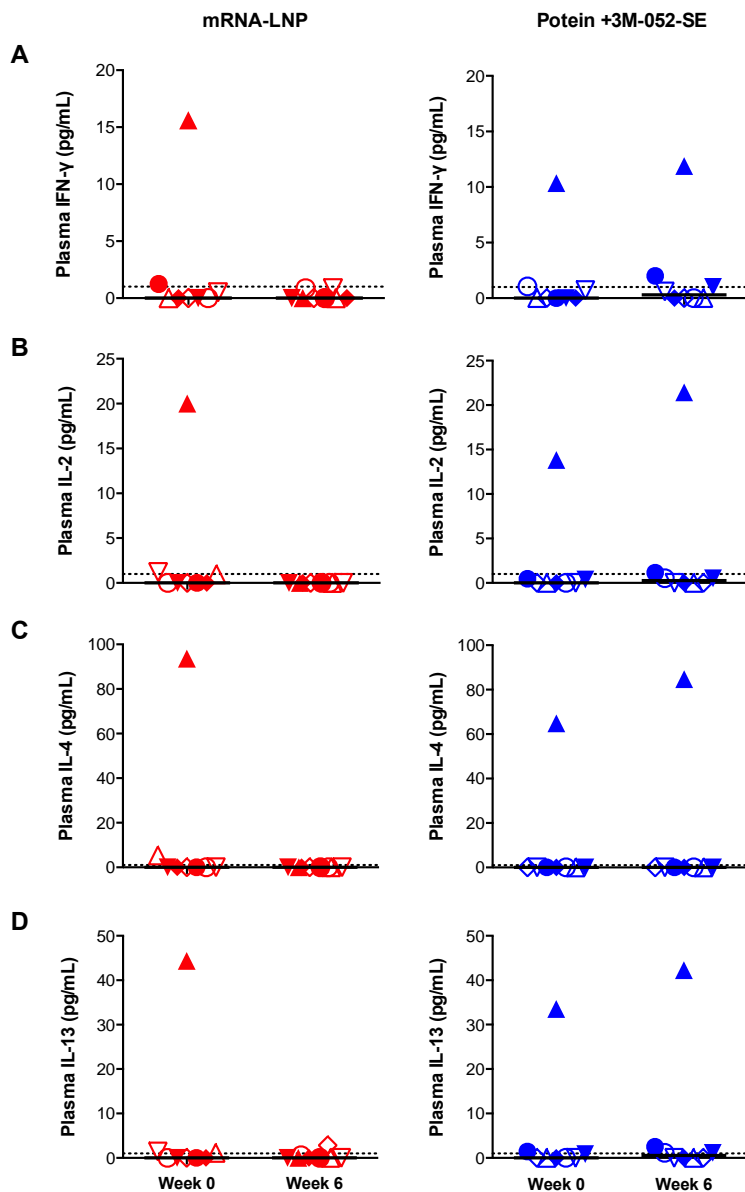

**Figure S2. Th1 and Th2 cytokines in plasma of infant rhesus macaques prior to and following SARS-CoV-2 vaccination.**

Plasma levels of IFN- $\gamma$  (**panel A**) IL-2 (**panel B**), IL-4 (**panel C**) and IL-13 (**panel D**) were measured by multiplex Luminex assay. Different symbols represent individual animals in the mRNA-LNP (red) or Protein+3M-052-SE (blue) vaccine groups, respectively (Table S1). Horizontal lines represent median values.

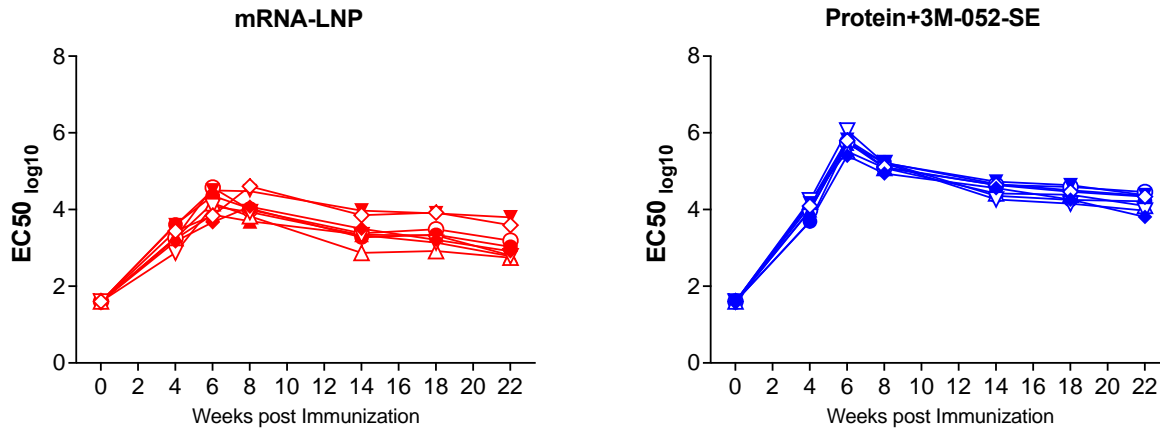

**Figure S3. Plasma spike-specific IgG.**

Plasma IgG binding responses were assessed by ELISA using serial dilutions of plasma. Data are reported as EC50 values. At week 0, EC50 values corresponding to the lowest dilution were applied instead of a “0” value for non-binding antibodies. Different symbols represent individual animals in the mRNA-LNP (red) or Protein+3M-052-SE (blue) vaccine groups, respectively (Table 1).

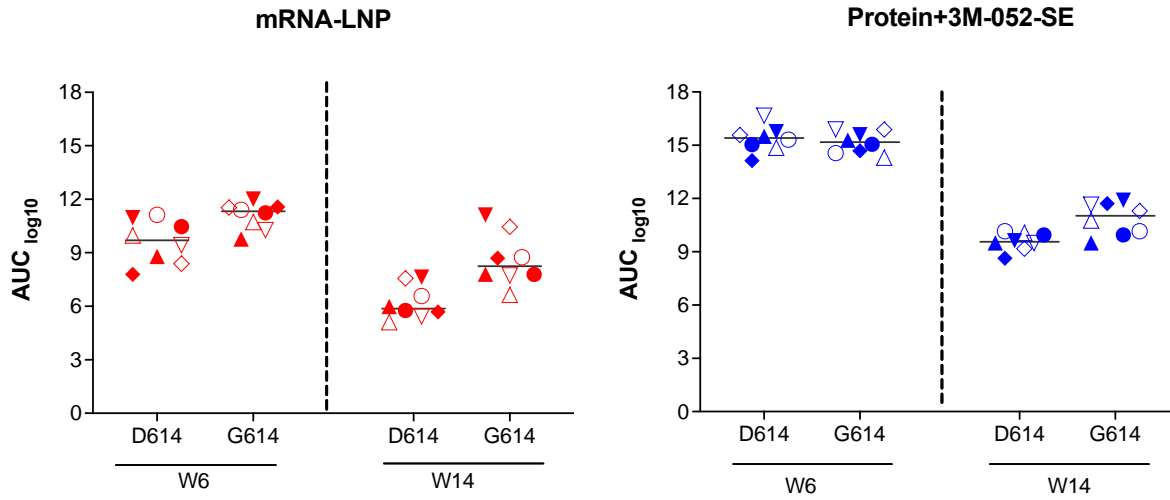

**Figure S4. IgG binding to the D614 spike protein and the D614G variant.**

Plasma IgG binding response was assessed by ELISA using serial dilutions of plasma collected at W6 and W14. Area under the curve (AUC) was compared between binding to D614 spike protein, the immunogen in both vaccines, and the G614 spike protein that was used in the neutralization assays because it represented the dominant variant at study initiation. Different symbols represent individual animals in the mRNA-LNP (red) or Protein+3M-052-SE (blue) vaccine groups, respectively (Table 1). Horizontal lines represent median values.

**mRNA-LNP**

**Protein+3M-052-SE**

**A: S-specific Plasma IgM**

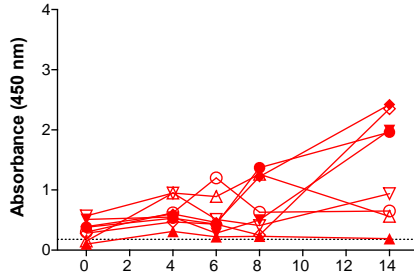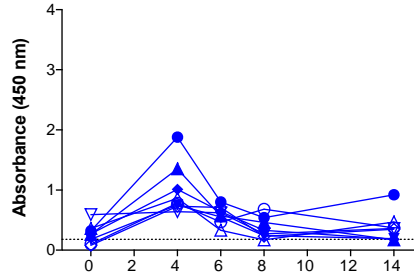

**B: S-specific Plasma IgA**

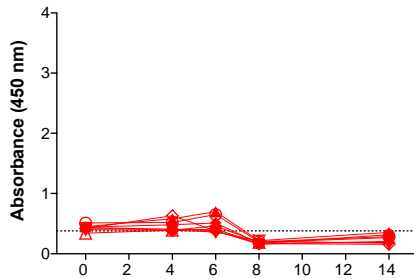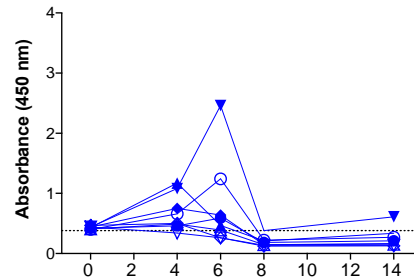

**C: RBD-specific Saliva IgA**

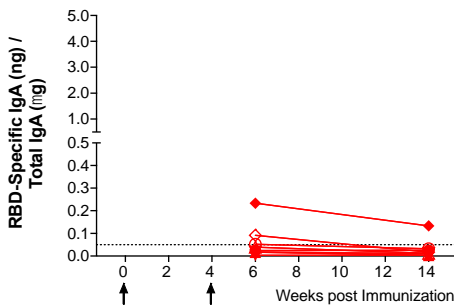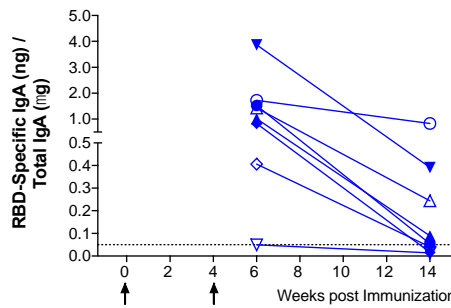

**Figure S5. Plasma IgM and IgA and salivary IgA responses in infant rhesus macaques.**

**Panels A and B** illustrate longitudinal plasma S-specific IgM (Panel A) and IgA (Panel B) levels measured by ELISA in 1:10 diluted plasma samples, reported as absorbance readings at 450 nm. In **Panel C**, we report receptor-binding domain-specific salivary IgA concentrations in ng per  $\mu\text{g}$  of total IgA. Note that salivary IgA was only measured at weeks 6 and 14. Red or blue lines and symbols represent the mRNA or protein vaccine groups, respectively, with different symbols representing individual animals (Table 1). In Panel C, the times of immunizations are indicated by arrows. The x-axis in all graphs lists the weeks after the first vaccine dose.

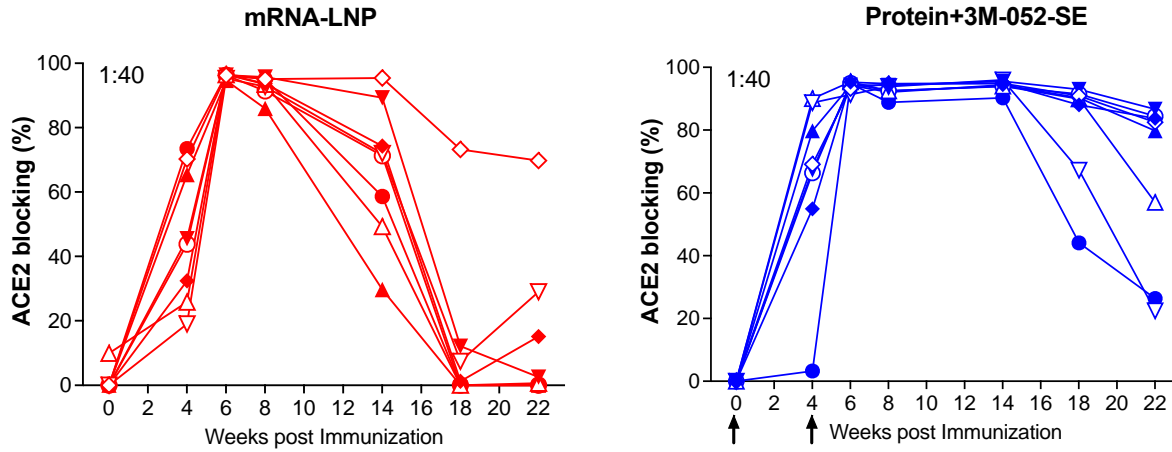

**Figure S6. Plasma ACE2 blocking responses.**

Capacity of plasma antibodies to mediate blocking of the RBD-ACE2 interaction was measured with an ELISA-based ACE2 blocking assay performed at 1:40 of vaccinated animals. Graph shows results as %ACE2 blocking in the mRNA-LNP (red) or Protein+3M-052-SE vaccine (blue) groups over time, with different symbols representing individual animals (Table 1).

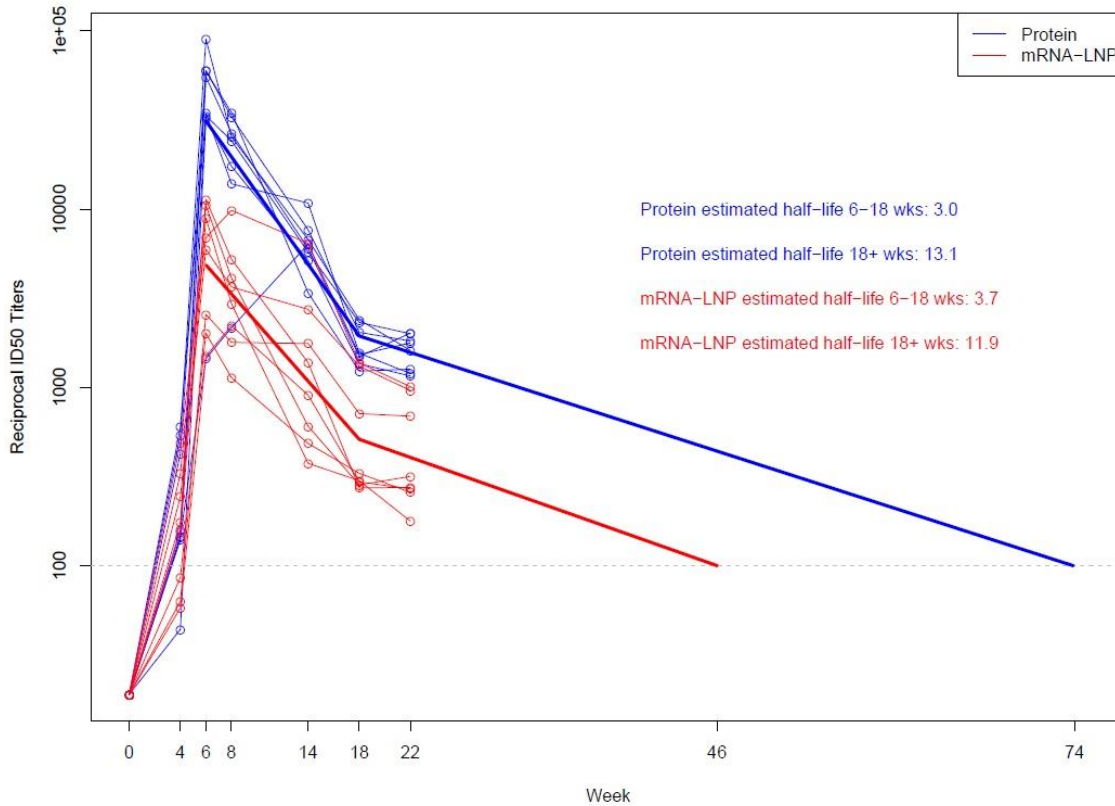

**Figure S7. Modelled bi-phasic decline of neutralizing ID<sub>50</sub> titers.**

ID<sub>50</sub> neutralization titer (obtained using the pseudovirus neutralization assay) decline half-life was estimated based on random-effects regression models of decay with first-order kinetics. Models were fit separately by vaccine group and data prior to the second vaccine dose (i.e., from weeks 0 and 4) were excluded. Bi-phasic decline was modeled using a linear spline with one knot, with different knots considered ranging from 8 to 18 weeks. For each vaccine group, the model with the knot at 18 weeks fit the best according to the Akaike Information Criterion.



**mRNA-LNP**

**Protein+3M-052-SE**

**A: Pseudovirus Neutralization**

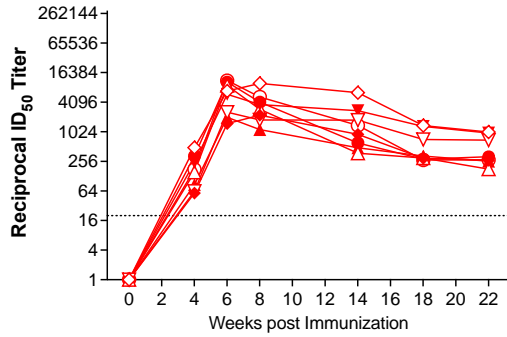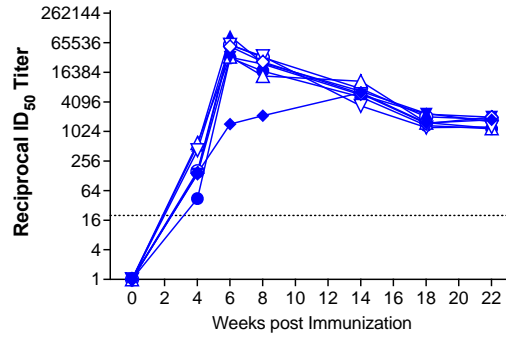

**B: Whole Virion Neutralization**

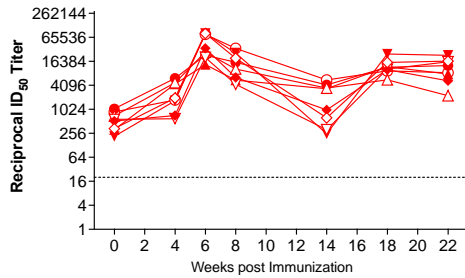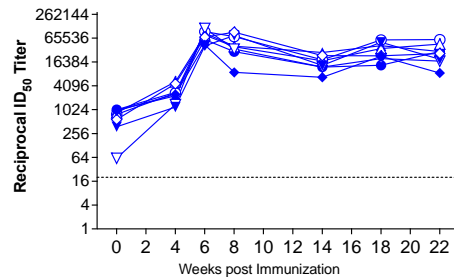

**C: Correlation of Pseudovirus and Whole Virion Neutralization Assays**

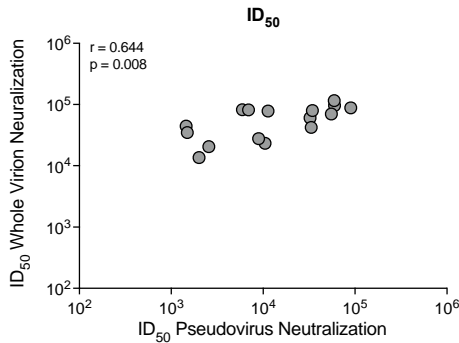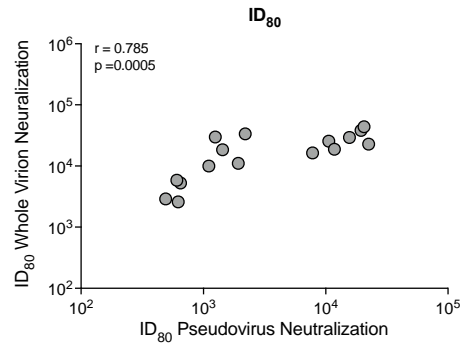

**Figure S8: Vaccine-elicited SARS-CoV-2 neutralization responses.**

**Panel A** shows the ID<sub>50</sub> neutralization titers obtained using Spike-pseudotyped viruses in 293T/ACE2 cells, and expressing the results as reciprocal 50% inhibitory dilution (ID<sub>50</sub>). **Panel B** shows the ID<sub>50</sub> neutralization titers obtained using a whole virus neutralization assay performed with Vero E6 cells. Dashed lines in Panels A and B indicate the detection cutoff. **Panel C** illustrates the correlation of ID<sub>50</sub> (left graph) and ID<sub>80</sub> (right graph) neutralizing titers from both vaccine groups obtained in the pseudovirus or whole virus neutralization assay at week 6. Correlation was assessed using Spearman rank test.

**A: Whole Virion Neutralization (WVNA) in Infants (W0) and dams**

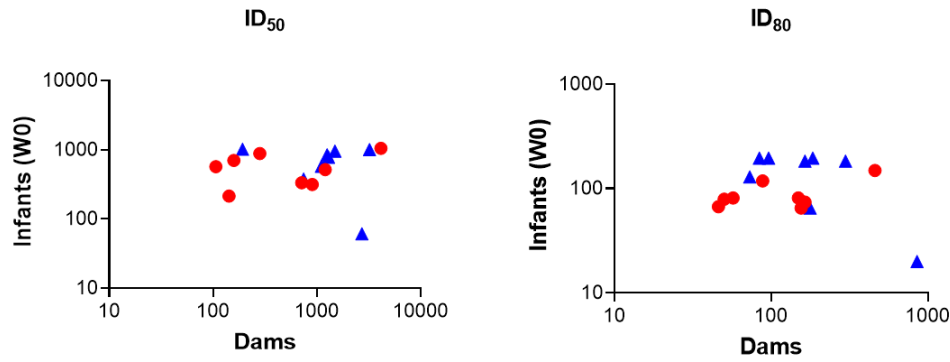

**B: Whole Virion Neutralization (WVNA) in Infants (W6) and dams**

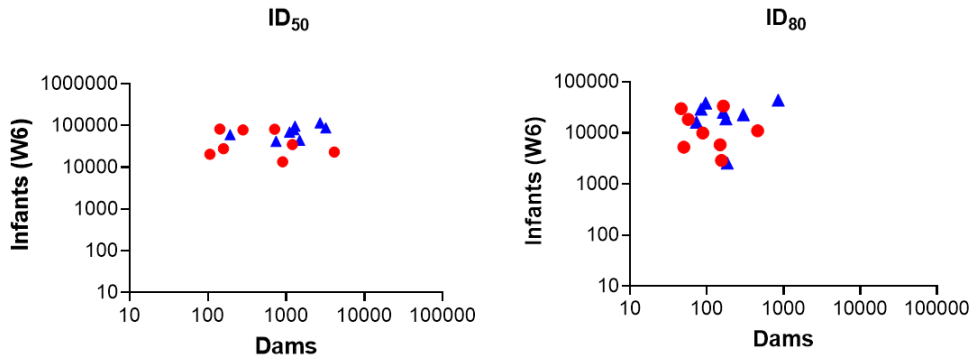

**Figure S9. Correlation of whole virion neutralization in dams and infants.**

Whole virion neutralization (WVNA) was measured in dams and in infants before the vaccine (W0) and after the vaccine boost (W6). There was no correlation of ID<sub>50</sub> or ID<sub>80</sub> neutralization titers between infants and dams (Spearman rank analysis). Blue symbols correspond to protein vaccine and red symbols to mRNA-LNP.

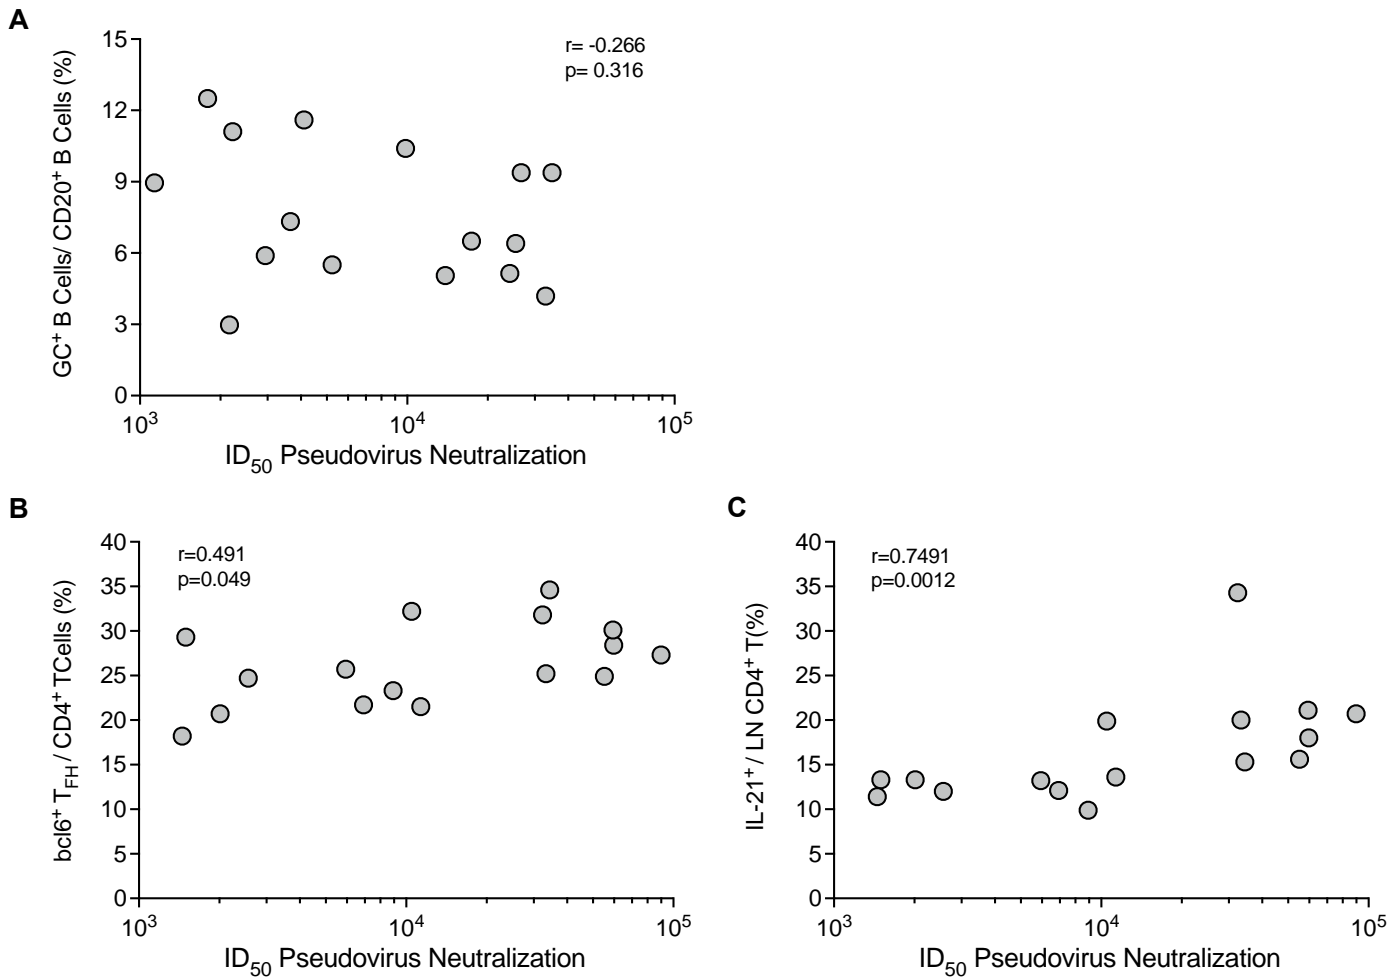

**Figure S10. Correlation between neutralizing antibody titers at week 6, germinal center B cells, follicular T helper cells, and IL-21<sup>+</sup> lymph node CD4<sup>+</sup> T cells.**

Pseudovirus neutralizing antibody ID<sub>50</sub> titers at week 6 did not correlate with the frequency of GC B cells **(A)** or bcl6<sup>+</sup> T<sub>FH</sub> **(B)**, but positively correlated with lymph node CD4<sup>+</sup>IL-21<sup>+</sup> T cells **(C)**. Each symbol represents a single animal, animals from both vaccine groups were included in the analysis. Correlations were assessed by Spearman rank test.

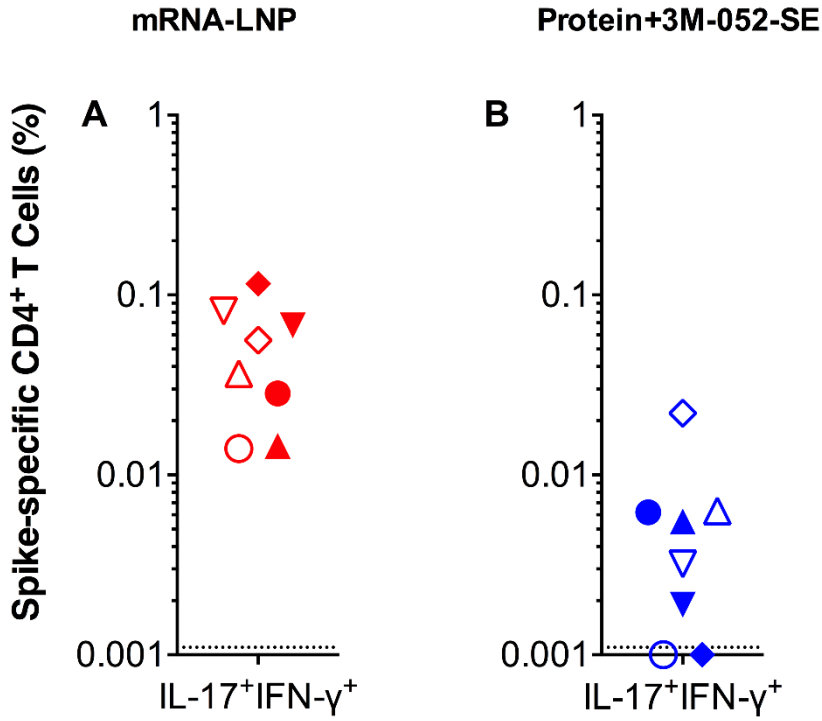

**Figure S11: Polyfunctional CD4<sup>+</sup> T cells in SARS-CoV-2 immunized infant rhesus macaques at week 14.**

**Panels A and B** show the frequencies of CD4<sup>+</sup> T cells that co-produced IL-17 and IFN-γ in response to stimulation with spike protein overlapping peptides in animals of the mRNA-LNP or Protein-3M-052-SE vaccine group, respectively. Individual symbols represent individual animals in each group (Table 1).

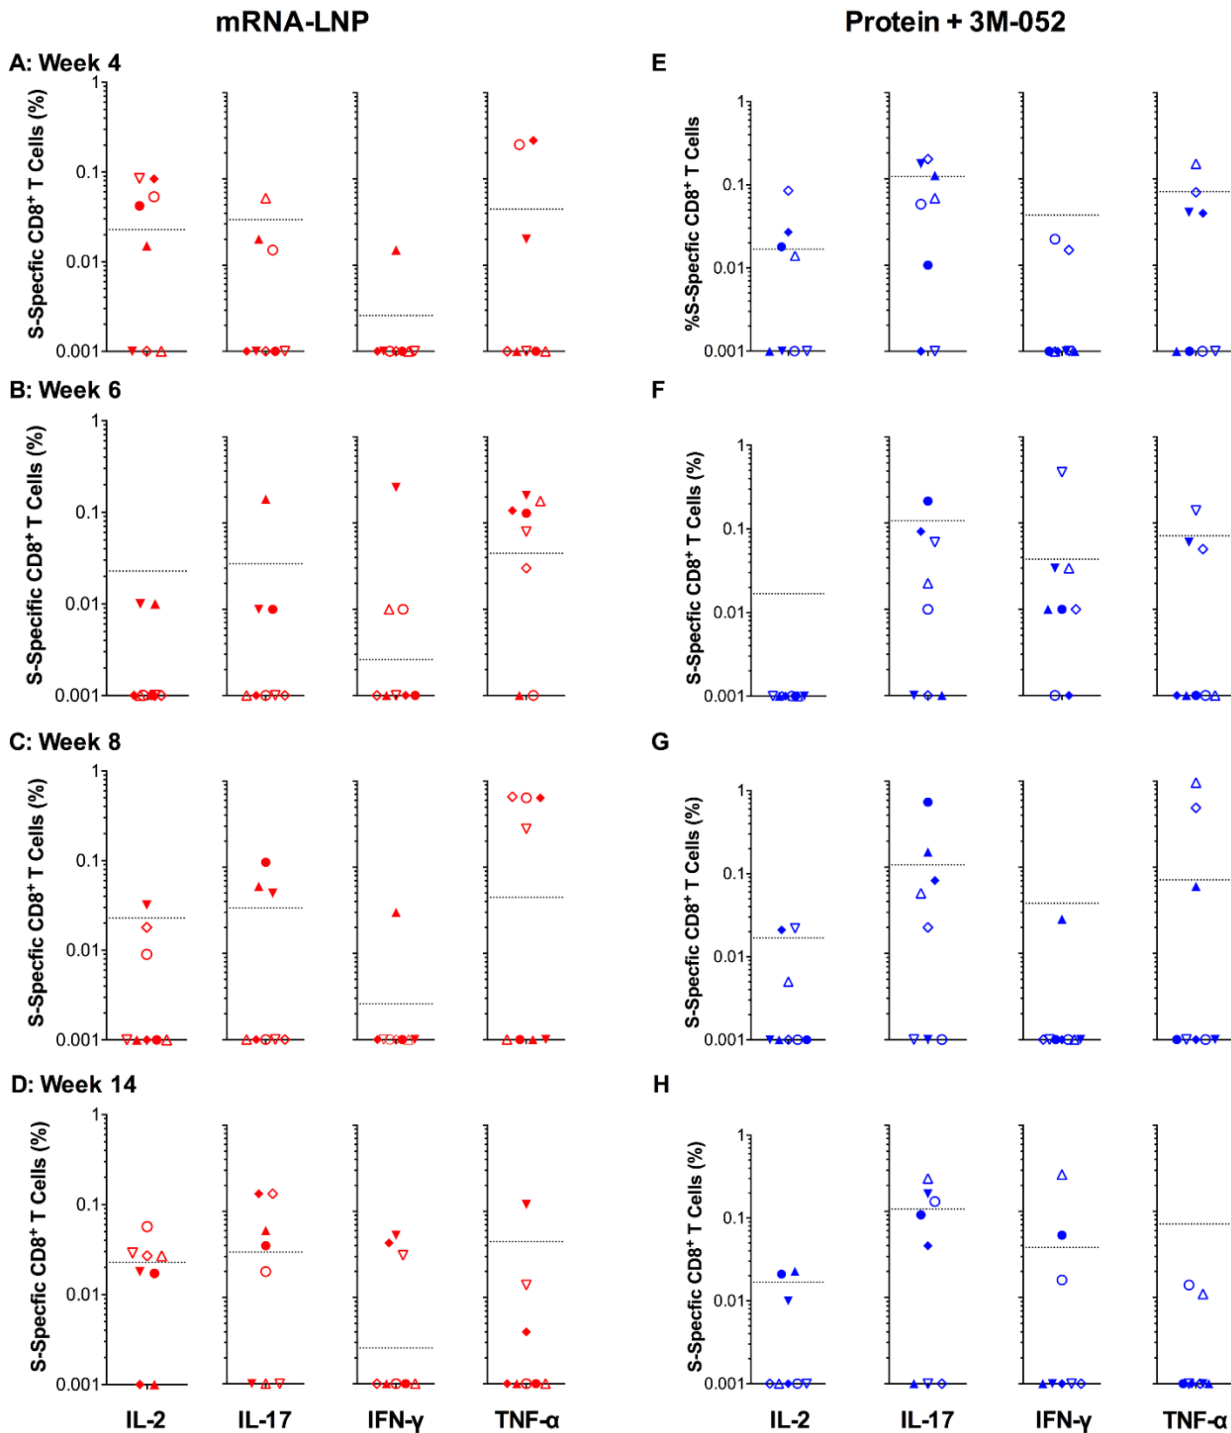

**Figure S12. Spike-specific CD8<sup>+</sup> T cell responses in SARS-CoV-2 immunized infant rhesus macaques.** Intracellular cytokine staining was performed as described in Figure 5 at weeks 0, 6, 4, 8, and 14 to assess CD8<sup>+</sup> T-cell responses. **Panels A, B, C and D** show responses detected in PBMC from the mRNA-LNP group at weeks 4, 6, 8, and 14, respectively. **Panels E, F, G and H** show responses in Protein+3M-052+SE vaccinees at weeks 4, 6, 8 and 14, respectively. The legend and symbols used mirror those from Figure S11

(see also Table 1). Dotted lines represent the cut-off for cytokine-positive responses, determined as 2 standard deviations above median values of SARS-CoV-2 naïve animals.

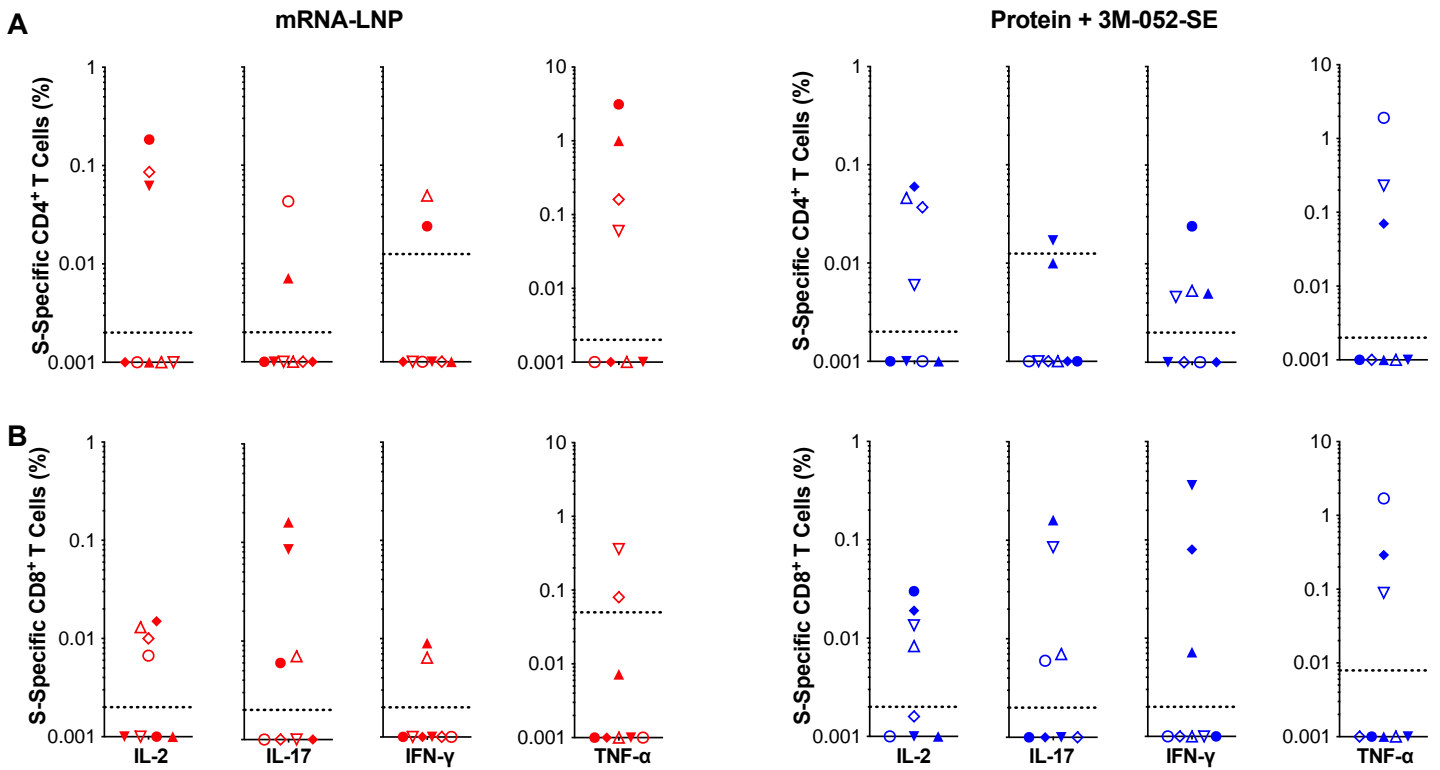

**Figure S13. Spike-specific T cell responses in LN following SARS-CoV-2 vaccination.**

Intracellular cytokine staining in lymph node biopsy samples at week 6 to measure Spike-specific T cell responses. **Panel A** shows mRNA-LNP and Protein+3M-052+SE CD4<sup>+</sup> T-cell responses, respectively. **Panel B** represents CD8<sup>+</sup> T cell cytokine responses from mRNA-LNP and Protein+3M-052+SE animals, respectively. Symbols and the legend mirror those from Figure S12 (see also Table 1). Dotted lines represent 2 standard deviations from SARS-CoV-2 naïve LN samples.

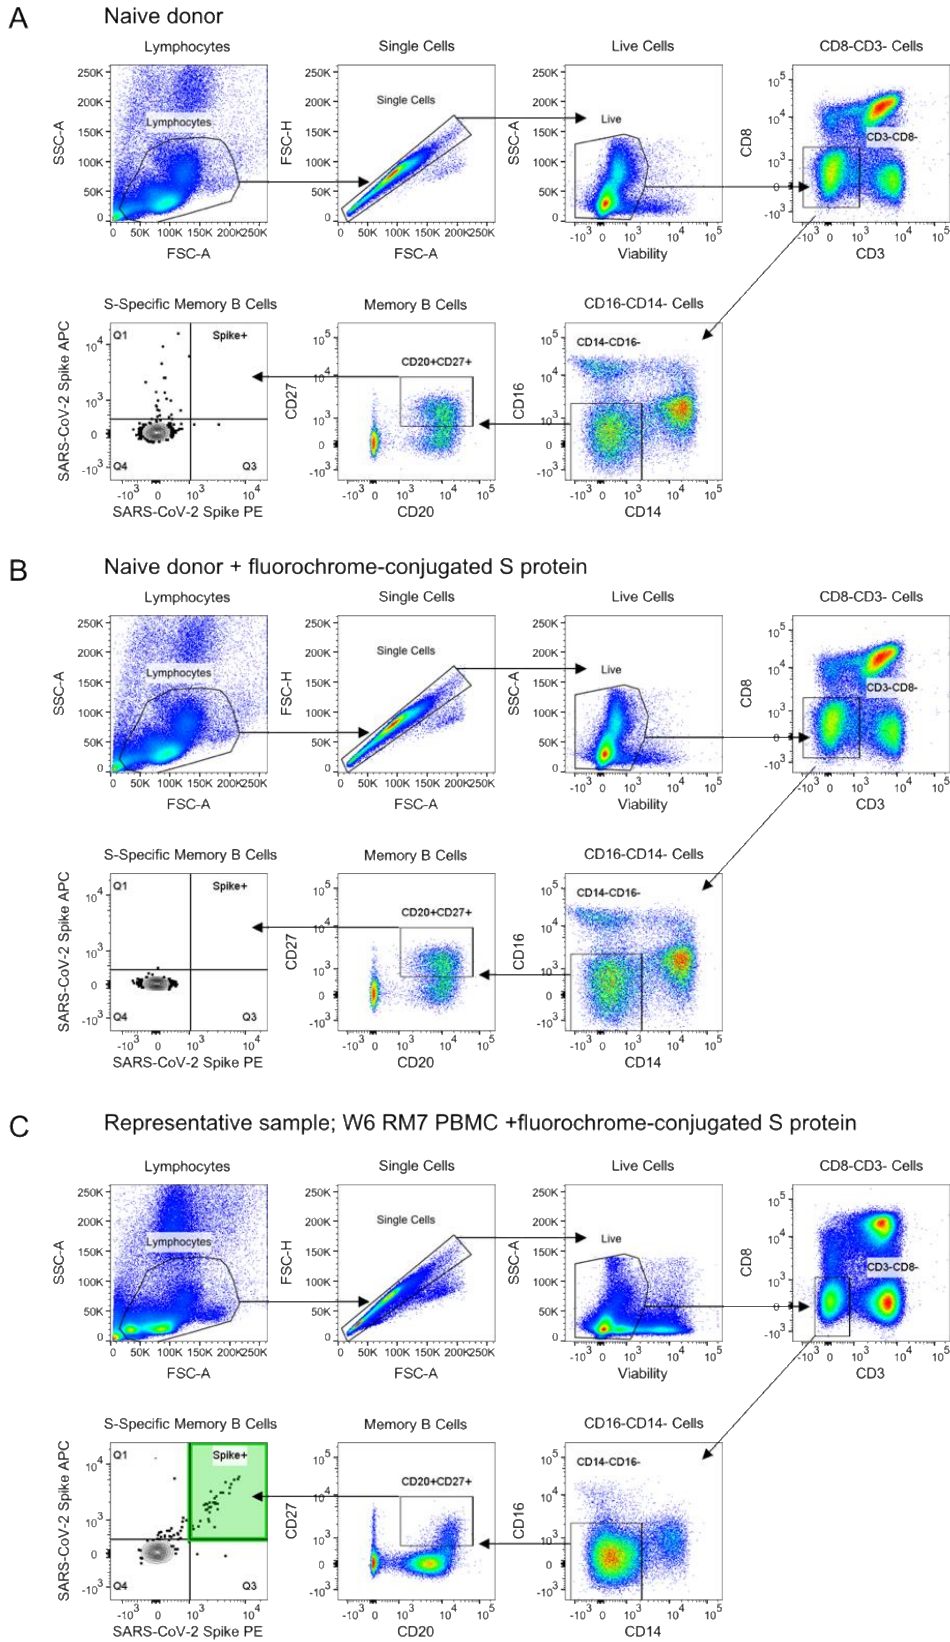

**Figure S14. S-specific B cell gating strategy.**



**Panel A** shows a representative plot from RM7; **Panel B** shows a naive, age-matched control macaque without SARS-CoV-2 S protein conjugates; **Panel C** shows the same donor macaque with the SARS-CoV-2 S protein conjugates included.

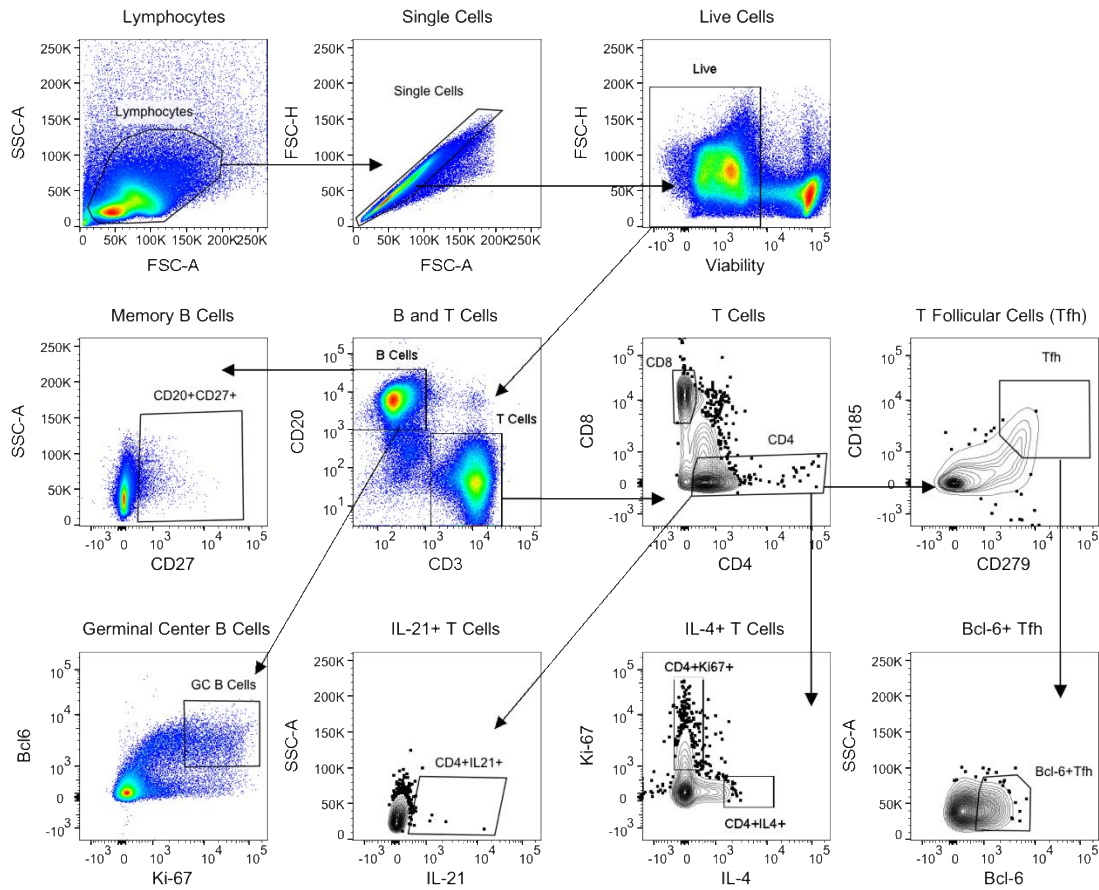

**Figure S15. Gating strategy for lymph node germinal center B cells and T cell populations.**

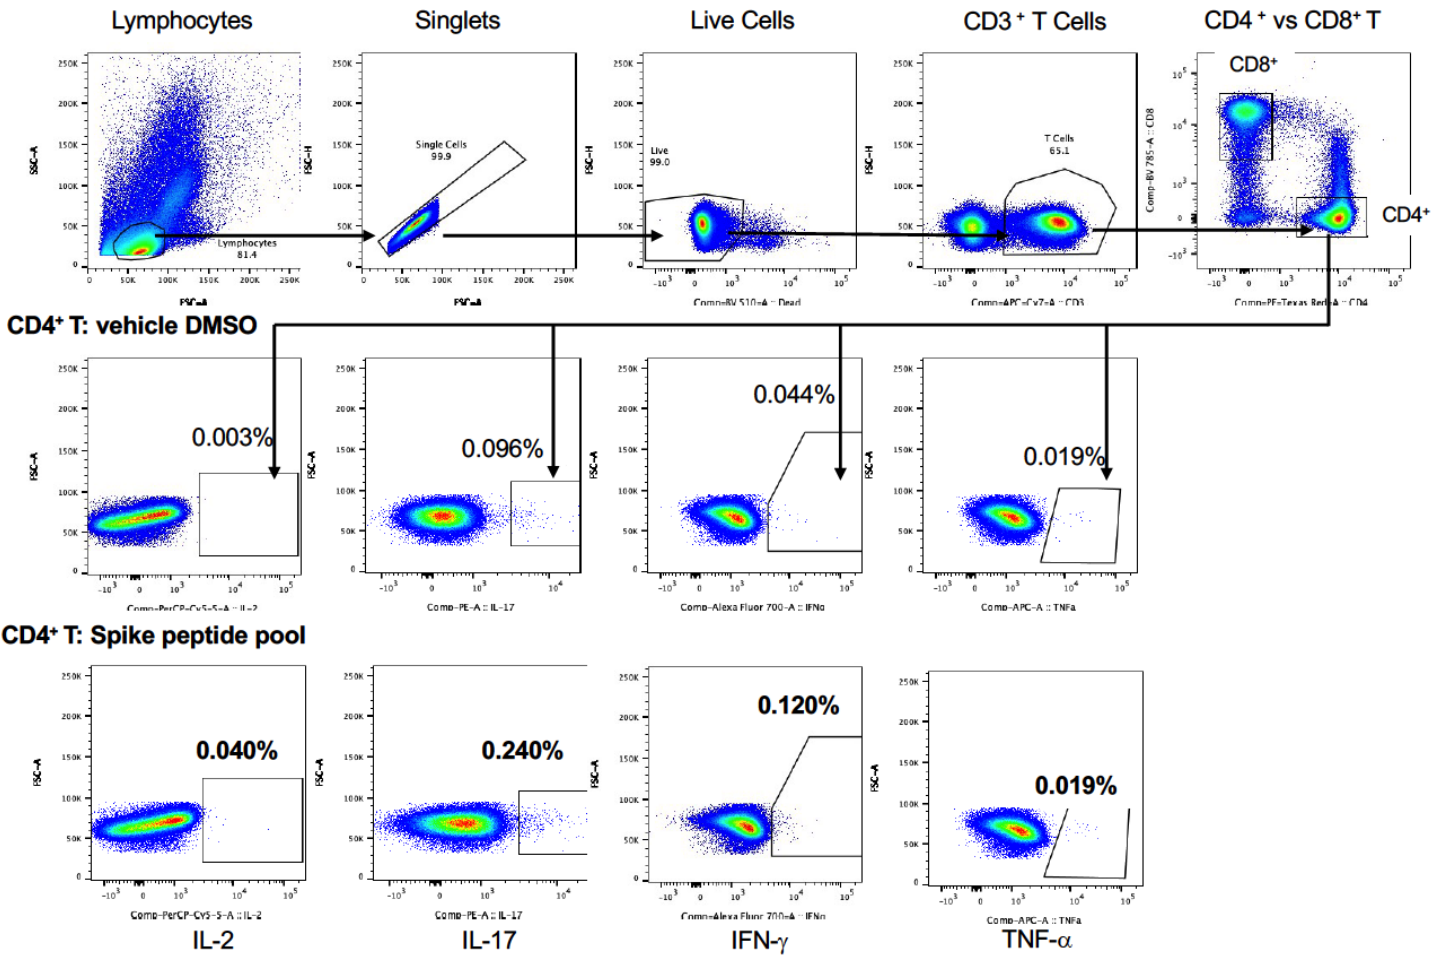

**Figure S16: Gating strategy for intracellular cytokine staining of spike-specific T cells.** Representative example of a week 14 sample. Lymphocytes were gated for singlets, live cells, and then for CD3<sup>+</sup> T cells and subsequently for CD4<sup>+</sup> and CD8<sup>+</sup> T cell populations. CD4<sup>+</sup> T cell population positive for IL-2, IL-17, IFN- $\gamma$ , or TNF- $\alpha$  production after stimulation with vehicle control (DMSO; middle panel) or the Spike protein peptide pool (bottom panel) are shown. The percent of cytokine positive T cells in indicated in each plot.

## Activation induced marker assay: vehicle DMSO

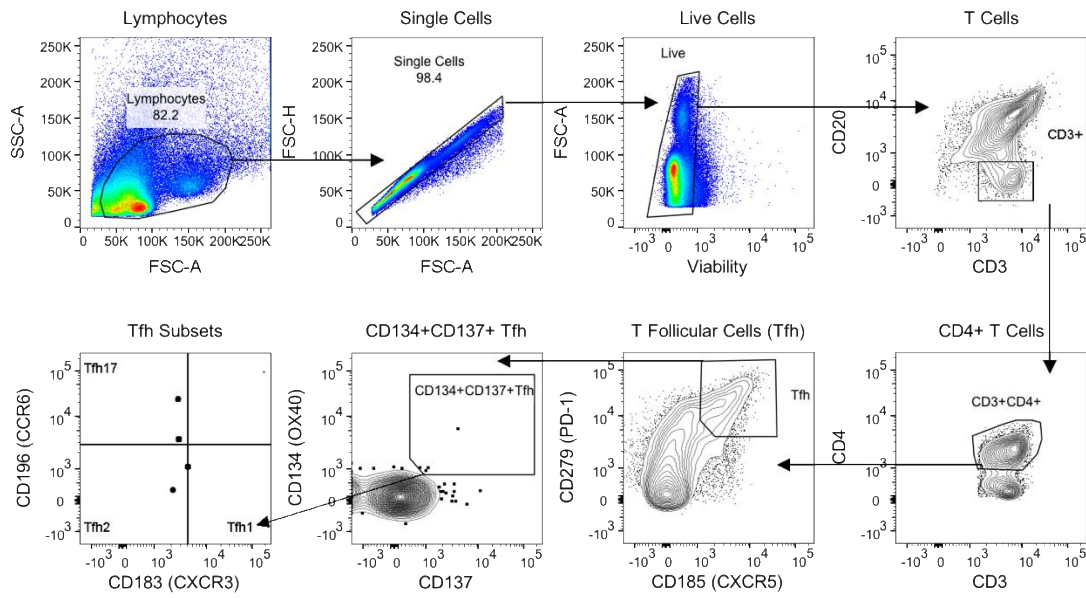

## Activation induced marker assay: +5 $\mu$ g SEB

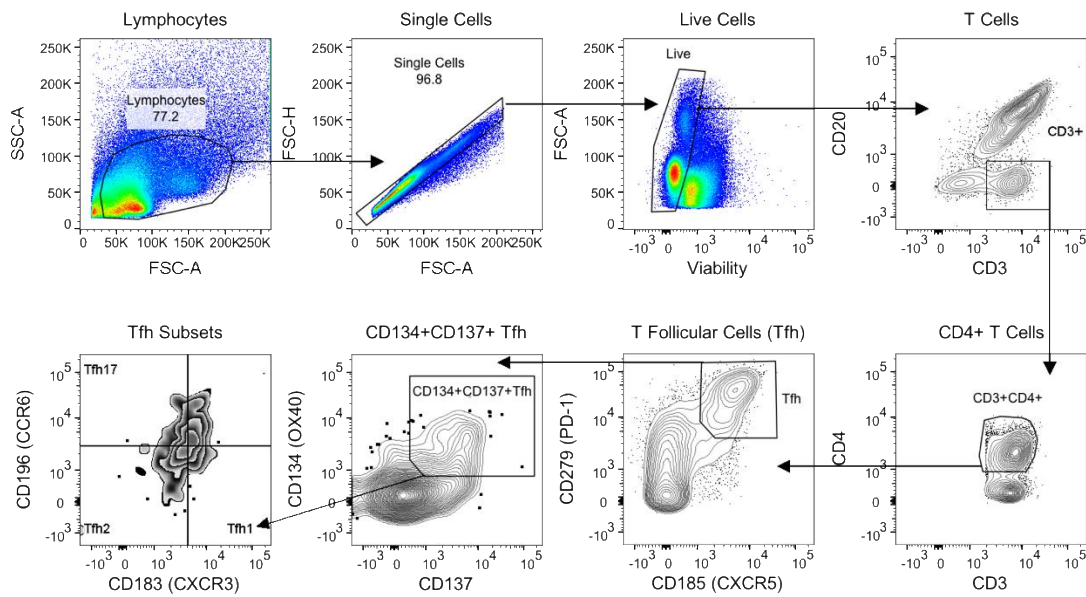

**Figure S17. Activation-induced marker assay gating strategy for follicular T helper cells.**

Top two rows: DMSO vehicle control cultures; bottom two rows: staphylococcal enterotoxin B-stimulated samples.

## Supplementary Tables

**Table S1: CBC reference values (A) for infant rhesus macaques age-matched to study animals immunized with (B) S-2P Protein+3M-052-SE or (C) S-2P mRNA-LNP vaccine.**

### A

| Reference Values (range)    |                             |           |           |           |           |               |                              |        |           |             |            |         |             |          |         |          |             |                            |
|-----------------------------|-----------------------------|-----------|-----------|-----------|-----------|---------------|------------------------------|--------|-----------|-------------|------------|---------|-------------|----------|---------|----------|-------------|----------------------------|
| WBC<br>x10 <sup>3</sup> /μl | RBC<br>x10 <sup>6</sup> /ul | Hgb gm/dl | HCT %     | MCV<br>fl | MCH pg    | MCHC<br>pg/fl | Plts<br>x10 <sup>5</sup> /μl | Segm % | Segm /μl  | Lympho<br>% | Lympho /μl | Mono %  | Mono<br>/μl | Eos<br>% | Eos /μl | Baso %   | Baso<br>/μl | Plasma<br>protein<br>gm/dl |
| 7.4-13.0                    | 4.91-5.69                   | 11.0-12.8 | 34.2-39.6 | 66-74     | 20.9-24.1 | 31.5-33.1     | 3.54-6.52                    | 25-47  | 1892-5418 | 49-72       | 4172-8114  | 1.0-5.0 | 69-626      | 1-3      | 62-283  | 1.0-1.48 | 64-142      | 6.2-6.9                    |

### B

| Protein+3M-052-SE |               |                             |                             |           |       |           |        |               |                              |        |          |             |            |        |             |          |         |        |             |                            |
|-------------------|---------------|-----------------------------|-----------------------------|-----------|-------|-----------|--------|---------------|------------------------------|--------|----------|-------------|------------|--------|-------------|----------|---------|--------|-------------|----------------------------|
| Animal            | Study<br>Week | WBC<br>x10 <sup>3</sup> /μl | RBC<br>x10 <sup>6</sup> /ul | Hgb gm/dl | HCT % | MCV<br>fl | MCH pg | MCHC<br>pg/fl | Plts<br>x10 <sup>5</sup> /μl | Segm % | Segm /μl | Lympho<br>% | Lympho /μl | Mono % | Mono<br>/μl | Eos<br>% | Eos /μl | Baso % | Baso<br>/μl | Plasma<br>protein<br>gm/dl |
| RM 1              | 0             | 8.00                        | 5.32                        | 12.50     | 38.5  | 72        | 23.50  | 32.40         | 6.73                         | 34     | 2720     | 63          | 5040       | 2      | 160         | 1        | 80      | 0      | 0           | 6.50                       |
|                   | 4             | 10.80                       | 5.31                        | 12.00     | 37.60 | 71        | 22.60  | 32.00         | 4.68                         | 59     | 6372     | 37          | 3996       | 4      | 432         | 0        | 0       | 0      | 0           | 6.80                       |
|                   | 6             | 9.20                        | 5.17                        | 11.40     | 36    | 70        | 22.10  | 31.80         | 4.08                         | 48     | 4416     | 46          | 4232       | 6      | 552         | 0        | 0       | 0      | 0           | 6.70                       |
|                   | 8             | 5.30                        | 5.18                        | 11.50     | 36.1  | 70        | 22.20  | 31.90         | 4.79                         | 24     | 1272     | 72          | 3816       | 3      | 159         | 0        | 0       | 1      | 53          | 6.70                       |
|                   | 14            | 8.20                        | 6.21                        | 13.20     | 42.1  | 68        | 21.30  | 31.50         | 4.17                         | 37     | 3034     | 60          | 4920       | 2      | 164         | 1        | 82      | 0      | 0           | 7.50                       |
| RM 2              | 0             | 6.40                        | 5.31                        | 12.30     | 38.0  | 72        | 23.10  | 32.20         | 3.30                         | 23     | 1472     | 67          | 4288       | 4      | 256         | 6        | 384     | 0      | 0           | 6.50                       |
|                   | 4             | 7.70                        | 5.81                        | 12.80     | 40.9  | 70        | 22.00  | 31.20         | 3.81                         | 23     | 1771     | 76          | 5852       | 1      | 77          | 0        | 0       | 0      | 0           | 6.50                       |
|                   | 6             | 11.10                       | 5.37                        | 12.10     | 37.7  | 70        | 22.50  | 32.10         | 0.96                         | 25     | 2775     | 68          | 7548       | 4      | 444         | 3        | 333     | 0      | 0           | 6.60                       |
|                   | 8             | 10.00                       | 5.73                        | 12.60     | 40.1  | 70        | 22.00  | 31.40         | 4.87                         | 31     | 3100     | 64          | 6400       | 4      | 400         | 1        | 100     | 0      | 0           | 7.00                       |
|                   | 14            | 9.00                        | 6.03                        | 12.90     | 41.3  | 68        | 21.40  | 31.30         | 3.99                         | 23     | 2070     | 73          | 6570       | 1      | 90          | 3        | 270     | 0      | 0           | 6.70                       |
| RM 3              | 0             | 7.70                        | 5.63                        | 12.90     | 39.7  | 71        | 22.90  | 32.50         | 3.88                         | 37     | 2849     | 55          | 4235       | 1      | 77          | 7        | 539     | 0      | 0           | 6.50                       |
|                   | 4             | 8.30                        | 5.73                        | 12.70     | 39.6  | 69        | 22.10  | 32.00         | 2.65                         | 25     | 2075     | 73          | 6059       | 0      | 0           | 2        | 166     | 0      | 0           | 6.50                       |
|                   | 6             | 10.70                       | 5.44                        | 11.80     | 37.5  | 69        | 21.80  | 31.60         | 2.64                         | 22     | 2354     | 73          | 7811       | 3      | 321         | 2        | 214     | 0      | 0           | 6.30                       |
|                   | 8             | 9.50                        | 5.60                        | 12.20     | 38.3  | 68        | 21.70  | 31.80         | 2.72                         | 38     | 3610     | 60          | 5700       | 2      | 190         | 0        | 0       | 0      | 0           | 6.40                       |
|                   | 14            | 8.40                        | 6.31                        | 13.20     | 42.5  | 67        | 21.00  | 31.10         | 5.04                         | 41     | 3444     | 57          | 4788       | 2      | 168         | 0        | 0       | 0      | 0           | 7.00                       |
| RM 4              | 0             | 8.00                        | 5.16                        | 12.20     | 38.3  | 74        | 23.70  | 31.90         | 5.59                         | 17     | 1360     | 76          | 6080       | 1      | 80          | 6        | 480     | 0      | 0           | 6.00                       |
|                   | 4             | 11.00                       | 5.46                        | 12.50     | 39.7  | 73        | 22.90  | 31.50         | 5.91                         | 29     | 3190     | 68          | 7480       | 1      | 110         | 2        | 220     | 0      | 0           | 6.20                       |
|                   | 6             | 9.50                        | 4.31                        | 9.50      | 30.5  | 71        | 22.00  | 31.10         | 2.64                         | 8      | 760      | 85          | 8075       | 3      | 285         | 4        | 380     | 0      | 0           | 6.00                       |
|                   | 8             | 15.70                       | 5.64                        | 12.60     | 40.0  | 71        | 22.20  | 31.40         | 3.36                         | 14     | 2198     | 83          | 13031      | 1      | 157         | 2        | 314     | 0      | 0           | 6.60                       |
|                   | 14            | 11.90                       | 5.57                        | 12.60     | 40.0  | 72        | 22.60  | 31.40         | 4.46                         | 16     | 1904     | 83          | 9877       | 1      | 119         | 0        | 0       | 0      | 0           | 6.50                       |
| RM 5              | 0             | 11.70                       | 6.09                        | 13.50     | 41.4  | 68        | 22.20  | 32.60         | 4.67                         | 31     | 3627     | 58          | 6786       | 6      | 702         | 5        | 585     | 0      | 0           | 6.60                       |
|                   | 4             | 18.30                       | 6.41                        | 13.70     | 42.8  | 67        | 21.40  | 32.10         | 4.08                         | 30     | 5490     | 60          | 10980      | 6      | 1098        | 4        | 732     | 0      | 0           | 7.00                       |
|                   | 6             | 15.80                       | 6.29                        | 13.20     | 41.8  | 67        | 20.90  | 31.50         | 3.48                         | 21     | 3318     | 64          | 10112      | 13     | 2054        | 2        | 316     | 0      | 0           | 6.80                       |
|                   | 8             | 11.50                       | 6.33                        | 13.10     | 41.3  | 65        | 20.70  | 31.70         | 2.78                         | 17     | 1955     | 74          | 8510       | 4      | 460         | 5        | 575     | 0      | 0           | 6.80                       |
|                   | 14            | 16.30                       | 6.50                        | 13.30     | 42.5  | 65        | 20.50  | 31.30         | 4.42                         | 22     | 3586     | 74          | 12062      | 3      | 489         | 1        | 163     | 0      | 0           | 7.10                       |
| RM 6              | 0             | 8.30                        | 5.51                        | 13.20     | 40.4  | 73        | 23.90  | 32.70         | 5.65                         | 21     | 1743     | 72          | 5976       | 5      | 415         | 2        | 166     | 0      | 0           | 6.50                       |
|                   | 4             | 11.60                       | 6.00                        | 13.90     | 42.8  | 71        | 23.10  | 32.40         | 4.59                         | 13     | 1508     | 81          | 9396       | 1      | 116         | 5        | 580     | 0      | 0           | 6.90                       |
|                   | 6             | 16.30                       | 5.76                        | 12.90     | 40.4  | 70        | 22.30  | 31.90         | 5.59                         | 26     | 4238     | 70          | 11410      | 3      | 489         | 1        | 163     | 0      | 0           | 6.80                       |
|                   | 8             | 8.20                        | 5.96                        | 13.20     | 41.1  | 69        | 22.20  | 32.10         | 2.87                         | 22     | 1804     | 72          | 5904       | 4      | 328         | 2        | 164     | 0      | 0           | 6.50                       |
|                   | 14            | 10.50                       | 5.76                        | 12.50     | 39.2  | 68        | 21.70  | 31.90         | 4.92                         | 33     | 3465     | 62          | 6510       | 1      | 105         | 4        | 420     | 0      | 0           | 6.80                       |
| RM 7              | 0             | 4.30                        | 4.57                        | 10.90     | 33.4  | 73        | 23.80  | 32.50         | 4.65                         | 19     | 817      | 77          | 3311       | 0      | 0           | 4        | 172     | 0      | 0           | 6.30                       |
|                   | 4             | 5.80                        | 4.88                        | 11.40     | 35.6  | 73        | 23.30  | 32.00         | 3.27                         | 24     | 1392     | 74          | 4292       | 1      | 58          | 1        | 58      | 0      | 0           | 6.10                       |
|                   | 6             | 8.70                        | 4.73                        | 11.00     | 34.6  | 73        | 23.20  | 31.70         | 5.33                         | 17     | 1479     | 77          | 6699       | 1      | 87          | 5        | 435     | 0      | 0           | 6.30                       |
|                   | 8             | 5.60                        | 4.90                        | 11.30     | 35.6  | 73        | 23.10  | 31.90         | 3.67                         | 30     | 1680     | 65          | 3640       | 0      | 0           | 5        | 280     | 0      | 0           | 6.10                       |
|                   | 14            | 9.10                        | 5.33                        | 12.30     | 38.5  | 72        | 23.20  | 32.00         | 4.88                         | 26     | 2366     | 68          | 6188       | 3      | 273         | 3        | 273     | 0      | 0           | 6.70                       |
| RM 8              | 0             | 8.80                        | 4.92                        | 12.30     | 37.3  | 76        | 25.00  | 33.00         | 4.94                         | 12     | 1056     | 82          | 7216       | 4      | 352         | 2        | 176     | 0      | 0           | 6.50                       |
|                   | 4             | 10.90                       | 5.04                        | 11.50     | 35.6  | 71        | 22.90  | 32.40         | 2.77                         | 26     | 2834     | 74          | 8066       | 0      | 0           | 0        | 0       | 0      | 0           | 6.30                       |
|                   | 6             | 9.80                        | 4.93                        | 11.10     | 34.7  | 70        | 22.50  | 32.00         | 4.75                         | 9      | 882      | 86          | 8428       | 5      | 490         | 0        | 0       | 0      | 0           | 6.40                       |
|                   | 8             | 10.90                       | 5.40                        | 12.40     | 38.5  | 71        | 22.90  | 32.20         | 4.05                         | 18     | 1962     | 69          | 7521       | 10     | 1090        | 3        | 327     | 0      | 0           | 6.30                       |
|                   | 14            | 9.20                        | 5.61                        | 13.00     | 40.3  | 72        | 23.10  | 32.20         | 2.95                         | 18     | 1656     | 76          | 6992       | 3      | 276         | 3        | 276     | 0      | 0           | 6.60                       |

C

| mRNA-LNP |            |                          |                          |           |       |        |        |            |                           |        |          |          |            |        |          |       |         |        |          |                      |
|----------|------------|--------------------------|--------------------------|-----------|-------|--------|--------|------------|---------------------------|--------|----------|----------|------------|--------|----------|-------|---------|--------|----------|----------------------|
| Animal   | Study Week | WBC x10 <sup>9</sup> /µl | RBC x10 <sup>6</sup> /µl | Hgb gm/dl | HCT % | MCV fl | MCH pg | MCHC pg/fl | Plts x10 <sup>9</sup> /µl | Segm % | Segm /µl | Lympho % | Lympho /µl | Mono % | Mono /µl | Eos % | Eos /µl | Baso % | Baso /µl | Plasma protein gm/dl |
| RM 9     | 0          | 11.70                    | 5.18                     | 12.90     | 39.7  | 77     | 24.90  | 32.50      | 4.70                      | 31     | 3627     | 65       | 7605       | 0      | 0        | 4     | 468     | 0      | 0        | 6.60                 |
|          | 4          | 11.20                    | 5.08                     | 12.40     | 37.4  | 74     | 24.40  | 33.10      | 4.12                      | 23     | 2576     | 73       | 8176       | 1      | 112      | 3     | 336     | 0      | 0        | 6.50                 |
|          | 6          | 11.30                    | 5.04                     | 11.80     | 36.4  | 72     | 23.30  | 32.30      | 4.87                      | 23     | 2599     | 71       | 8023       | 0      | 0        | 6     | 678     | 0      | 0        | 6.60                 |
|          | 8          | 10.60                    | 5.34                     | 11.90     | 37.5  | 70     | 22.20  | 31.60      | 4.77                      | 26     | 2756     | 70       | 7420       | 3      | 318      | 1     | 106     | 0      | 0        | 7.40                 |
|          | 14         | 8.30                     | 5.68                     | 12.60     | 39.9  | 70     | 22.20  | 31.70      | 3.88                      | 42     | 3486     | 54       | 4482       | 0      | 0        | 4     | 332     | 0      | 0        | 7.00                 |
| RM 10    | 0          | 8.00                     | 5.57                     | 12.70     | 39.3  | 71     | 22.90  | 32.40      | 4.07                      | 29     | 2320     | 69       | 5520       | 1      | 80       | 1     | 80      | 0      | 0        | 6.60                 |
|          | 4          | 10.40                    | 6.02                     | 13.10     | 41.4  | 69     | 21.80  | 31.70      | 4.01                      | 30     | 3120     | 64       | 6656       | 0      | 0        | 6     | 624     | 0      | 0        | 6.50                 |
|          | 6          | 10.50                    | 5.84                     | 12.80     | 39.8  | 68     | 21.80  | 32.00      | 3.83                      | 17     | 1785     | 59       | 6195       | 8      | 840      | 16    | 1680    | 0      | 0        | 6.50                 |
|          | 8          | 8.40                     | 5.80                     | 12.60     | 39.5  | 68     | 21.80  | 32.00      | 4.35                      | 21     | 1764     | 68       | 5712       | 5      | 420      | 6     | 504     | 0      | 0        | 7.10                 |
|          | 14         | 7.70                     | 5.89                     | 12.70     | 39.5  | 67     | 21.50  | 32.10      | 0.64                      | 20     | 1540     | 75       | 5775       | 3      | 231      | 2     | 154     | 0      | 0        | 7.50                 |
| RM 11    | 0          | 8.40                     | 5.52                     | 12.90     | 39.9  | 72     | 23.30  | 32.30      | 2.35                      | 30     | 2520     | 68       | 5712       | 0      | 0        | 2     | 168     | 0      | 0        | 6.60                 |
|          | 4          | 10.60                    | 5.08                     | 11.70     | 36.1  | 71     | 23.00  | 32.40      | 6.46                      | 29     | 3074     | 67       | 7102       | 1      | 106      | 3     | 318     | 0      | 0        | 6.50                 |
|          | 6          | 10.30                    | 4.63                     | 10.60     | 33.1  | 72     | 22.90  | 32.10      | 8.44                      | 20     | 2060     | 79       | 8137       | 1      | 103      | 0     | 0       | 0      | 0        | 6.20                 |
|          | 8          | 9.10                     | 5.23                     | 12.00     | 37.9  | 72     | 22.80  | 31.60      | 5.58                      | 28     | 2548     | 64       | 5824       | 8      | 728      | 0     | 0       | 0      | 0        | 6.60                 |
|          | 14         | 7.60                     | 5.32                     | 11.90     | 37.7  | 71     | 22.40  | 31.60      | 4.28                      | 26     | 1976     | 70       | 5320       | 3      | 228      | 1     | 76      | 0      | 0        | 6.60                 |
| RM 12    | 0          | 10.10                    | 5.77                     | 13.60     | 42.6  | 74     | 23.60  | 32.00      | 3.83                      | 42     | 4242     | 55       | 5555       | 2      | 202      | 1     | 101     | 0      | 0        | 6.50                 |
|          | 4          | 10.30                    | 5.58                     | 12.90     | 40.3  | 72     | 23.20  | 32.10      | 4.92                      | 43     | 4429     | 55       | 5665       | 0      | 0        | 2     | 206     | 0      | 0        | 6.50                 |
|          | 6          | 10.50                    | 5.57                     | 12.90     | 40.1  | 72     | 23.10  | 32.00      | 3.62                      | 25     | 2625     | 69       | 7245       | 1      | 105      | 5     | 525     | 0      | 0        | 6.70                 |
|          | 8          | 8.20                     | 5.52                     | 12.70     | 40.4  | 73     | 23.00  | 31.40      | 3.94                      | 28     | 2296     | 69       | 5658       | 2      | 164      | 1     | 82      | 0      | 0        | 6.40                 |
|          | 14         | 9.40                     | 5.88                     | 13.40     | 42.2  | 72     | 22.90  | 31.90      | 4.17                      | 24     | 2256     | 72       | 6768       | 0      | 0        | 4     | 376     | 0      | 0        | 6.50                 |
| RM 13    | 0          | 13.00                    | 5.77                     | 12.60     | 40.0  | 69     | 21.90  | 31.60      | 5.79                      | 24     | 3120     | 69       | 8970       | 3      | 390      | 4     | 520     | 0      | 0        | 6.60                 |
|          | 4          | 17.60                    | 5.94                     | 12.40     | 39.0  | 66     | 20.80  | 31.70      | 5.77                      | 32     | 5632     | 63       | 11088      | 2      | 352      | 3     | 528     | 0      | 0        | 6.40                 |
|          | 6          | 15.90                    | 5.54                     | 10.80     | 34.5  | 62     | 19.40  | 31.10      | 6.10                      | 38     | 6042     | 59       | 9381       | 2      | 318      | 1     | 159     | 0      | 0        | 6.30                 |
|          | 8          | 17.30                    | 5.68                     | 10.10     | 33.5  | 59     | 17.80  | 30.20      | 7.37                      | 33     | 5709     | 57       | 9861       | 4      | 692      | 6     | 1038    | 0      | 0        | 6.90                 |
|          | 14         | 15.90                    | 6.36                     | 9.10      | 31.8  | 50     | 14.40  | 28.80      | 8.37                      | 40     | 6360     | 55       | 8745       | 0      | 0        | 5     | 795     | 0      | 0        | 6.80                 |
| RM 14    | 0          | 10.70                    | 4.95                     | 12.40     | 37.3  | 75     | 25.00  | 33.20      | 4.44                      | 32     | 3424     | 56       | 5992       | 2      | 214      | 10    | 1070    | 0      | 0        | 6.20                 |
|          | 4          | 10.50                    | 5.25                     | 12.70     | 38.7  | 74     | 24.20  | 32.90      | 2.07                      | 32     | 3360     | 64       | 6720       | 0      | 0        | 4     | 420     | 0      | 0        | 6.10                 |
|          | 6          | 6.90                     | 4.41                     | 10.50     | 32.3  | 73     | 23.90  | 32.70      | 1.62                      | 32     | 2208     | 62       | 4278       | 2      | 138      | 4     | 276     | 0      | 0        | 6.00                 |
|          | 8          | 11.60                    | 5.10                     | 12.30     | 37.5  | 74     | 24.10  | 32.80      | 5.50                      | 34     | 3944     | 58       | 6728       | 6      | 696      | 2     | 232     | 0      | 0        | 6.00                 |
|          | 14         | 11.50                    | 5.38                     | 12.70     | 39.1  | 73     | 23.60  | 32.50      | 4.38                      | 33     | 3795     | 63       | 7245       | 1      | 115      | 3     | 345     | 0      | 0        | 6.50                 |
| RM 15    | 0          | 7.80                     | 5.33                     | 12.90     | 39.9  | 75     | 24.10  | 32.20      | 4.40                      | 13     | 1014     | 80       | 6240       | 0      | 0        | 7     | 546     | 0      | 0        | 6.30                 |
|          | 4          | 9.00                     | 5.43                     | 12.30     | 38.8  | 72     | 22.70  | 31.70      | 4.91                      | 8      | 720      | 88       | 7920       | 1      | 90       | 3     | 270     | 0      | 0        | 6.30                 |
|          | 6          | 7.20                     | 5.51                     | 12.40     | 39.5  | 72     | 22.50  | 31.30      | 5.19                      | 29     | 2088     | 71       | 5112       | 0      | 0        | 0     | 0       | 0      | 0        | 6.60                 |
|          | 8          | 9.20                     | 5.33                     | 12.10     | 38.2  | 72     | 22.60  | 31.60      | 5.41                      | 16     | 1472     | 79       | 7268       | 4      | 368      | 1     | 92      | 0      | 0        | 6.40                 |
|          | 14         | 9.90                     | 5.55                     | 12.40     | 39.7  | 71     | 22.40  | 31.30      | 4.28                      | 13     | 1287     | 82       | 8118       | 2      | 198      | 3     | 297     | 0      | 0        | 6.70                 |
| RM 16    | 0          | 5.60                     | 5.66                     | 13.50     | 41.5  | 73     | 23.80  | 32.50      | 2.73                      | 22     | 1232     | 74       | 4144       | 4      | 224      | 0     | 0       | 0      | 0        | 6.60                 |
|          | 4          | 6.90                     | 5.67                     | 13.00     | 41.0  | 72     | 23.00  | 31.80      | 3.25                      | 23     | 1587     | 74       | 5106       | 1      | 69       | 2     | 138     | 0      | 0        | 6.60                 |
|          | 6          | 5.90                     | 5.29                     | 12.30     | 38.6  | 73     | 23.30  | 31.90      | 4.76                      | 19     | 1121     | 77       | 4543       | 0      | 0        | 4     | 236     | 0      | 0        | 6.70                 |
|          | 8          | 5.60                     | 5.28                     | 12.30     | 38.8  | 73     | 23.20  | 31.60      | 5.06                      | 21     | 1176     | 71       | 3976       | 5      | 280      | 3     | 168     | 0      | 0        | 6.80                 |
|          | 14         | 4.70                     | 5.82                     | 13.30     | 41.8  | 72     | 22.20  | 31.70      | 4.23                      | 18     | 846      | 76       | 3572       | 1      | 47       | 5     | 235     | 0      | 0        | 7.20                 |

Abbreviations:

- WBC: white blood cells
- RBC: red blood cells
- Hgb: hemoglobin
- HCT: hematocrit
- MCV: mean corpuscular volume
- MCH: mean corpuscular hemoglobin
- MCHC: mean corpuscular hemoglobin concentration
- Plts: platelets
- Segm: segmented neutrophils
- Lympho: lymphocytes
- Mono: monocytes
- Eos: eosinophils
- Baso: basophils

**Table S2. Reagents for flow cytometric analysis**

| <b>Assay</b>                           | <b>Target</b> | <b>Clone</b> | <b>Fluorochrome</b> | <b>Vendor</b> | <b>Catalogue No.</b> | <b>Titration</b> |
|----------------------------------------|---------------|--------------|---------------------|---------------|----------------------|------------------|
| <b>Spike-Specific B Cells</b>          |               |              |                     |               |                      |                  |
|                                        | Viability     | N/A          | Aqua                | Invitrogen    | L34966               | 1:1000           |
|                                        | CD3           | SP34-2       | APC-Cy7             | BD            | 557757               | 1:20             |
|                                        | CD8           | RPA-T8       | PE-CF594            | BD            | 562282               | 1:20             |
|                                        | CD14          | M5E2         | BV786               | BD            | 563698               | 1:20             |
|                                        | CD16          | 3G8          | PE-Cy7              | BD            | 560716               | 1:20             |
|                                        | CD20          | 2H7          | BUV395              | BD            | 563782               | 1:20             |
|                                        | CD27          | O323         | PerCPeFluor710      | Invitrogen    | 46-0279-42           | 1:20             |
|                                        | IgD           | Polyclonal   | AF488               | Southern Bio  | 2030-30              | 1:20             |
|                                        | IgM           | G20-127      | BV421               | BD            | 562816               | 1:20             |
|                                        | S-specific    | N/A          | APC                 | N/A           | N/A                  | 2 µg             |
|                                        | S-specific    | N/A          | PE                  | N/A           | N/A                  | 2 µg             |
| <b>T Cell Cytokines</b>                |               |              |                     |               |                      |                  |
|                                        | Viability     | NA           | Aqua                | Invitrogen    | L34966               | 1:1000           |
|                                        | CD3           | SP34-2       | APC-Cy7             | BD            | 557757               | 1:50             |
|                                        | CD4           | L200         | PE-CF594            | BD            | 562402               | 1:50             |
|                                        | CD8           | RPA-T8       | BV786               | BD            | 563823               | 1:50             |
|                                        | CD45RA        | 5H9          | V450                | BD            | 561220               | 1:50             |
|                                        | CCR7          | 3D12         | PE-Cy7              | BD            | 557648               | 1:25             |
|                                        | IL-2          | MQ1-17H12    | PerCP-Cy5.5         | BD            | 560708               | 1:25             |
|                                        | IL-17         | eBio64CAP17  | PE                  | eBiosciences  | 12-7178-42           | 1:25             |
|                                        | IFN-g         | B27          | Alexa F 700         | BD            | 557995               | 1:25             |
|                                        | TNF-a         | Mab11        | APC                 | BD            | 551384               | 1:25             |
|                                        | Granzyme B    | GB11         | FITC                | BD            | 560211               | 1:25             |
| <b>Activation-Induced Marker</b>       |               |              |                     |               |                      |                  |
|                                        | Viability     | N/A          | Aqua                | Invitrogen    | L34966               | 1:1000           |
|                                        | CD3           | SP34-2       | BUV395              | BD            | 564117               | 1:20             |
|                                        | CD4           | L200         | FITC                | BD            | 566802               | 1:20             |
|                                        | CD8           | RPA-T8       | BV786               | BD            | 563823               | 1:20             |
|                                        | CD20          | 2H7          | APC-H7              | BD            | 560734               | 1:20             |
|                                        | CD183         | 1C6/CXCR3    | BB700               | BD            | 566532               | 1:10             |
|                                        | CD185         | MU5UBEE      | PE-Cy7              | Invitrogen    | 25-9185-42           | 1:20             |
|                                        | CD196         | 11A9         | PECF594             | BD            | 564816               | 1:10             |
|                                        | CD134         | L106         | PE                  | BD            | 340420               | 1:5              |
|                                        | CD137         | 4B4-1        | BV650               | Biolegend     | 309828               | 1:20             |
|                                        | CD279         | EH12.2H7     | BV421               | Biolegend     | 329920               | 1:20             |
| <b>Germinal Center B &amp; T Cells</b> |               |              |                     |               |                      |                  |
|                                        | Viability     | N/A          | Aqua                | Invitrogen    | L34966               | 1:1000           |
|                                        | CD3           | SP34-2       | BUV395              | BD            | 564117               | 1:25             |
|                                        | CD4           | L200         | FITC                | BD            | 566802               | 1:25             |
|                                        | CD8           | RPA-T8       | BV786               | BD            | 563823               | 1:25             |
|                                        | CD20          | 2H7          | APC-H7              | BD            | 560734               | 1:25             |
|                                        | CD27          | O323         | PerCP-eFluor710     | Invitrogen    | 46-0279-42           | 1:20             |
|                                        | CD185         | MU5UBEE      | PE-Cy7              | Invitrogen    | 25-9185-42           | 1:25             |
|                                        | CD279         | EH12.2H7     | BV650               | Biolegend     | 329950               | 1:25             |
|                                        | Ki-67         | B56          | BV421               | BD            | 562899               | 1:20             |
|                                        | IL-21         | 3A3-N2.1     | PE                  | BD            | 560463               | 1:5              |
|                                        | Bcl-6         | K112-91      | PE-CF594            | BD            | 562401               | 1:20             |
|                                        | IL-4          | 8D4-8        | APC                 | Invitrogen    | 17-7049-42           | 1:20             |
